# Supplementary material for: Could Collected Chemical Parameters Be Utilized to Build Soft Sensors Capable of Predicting the Provenance, Vintages, and Price Points of New Zealand Pinot Noir Wines Simultaneously?
Source: MDPI journal article supplement (doi:10.3390/foods12020323), 2023-01-09
Supplement: s1 [file s1]

## Supplementary Materials

# Could Collected Chemical Parameters Be Utilized to Build Soft Sensors Capable of Predicting the Provenance, Vintages, and Price Points of New Zealand Pinot Noir Wines Simultaneously?

### Pinot noir wines

One hundred seventeen bottles of commercially New Zealand wines from five main regions (Central Otago, Marlborough, Martinborough, Nelson and North Canterbury) were studied, with retail prices of the wines ranging from NZ \$10 to NZ \$80, and vintage years from 2011 to 2020. Among one hundred seventeen bottles of commercially New Zealand Pinot noir wines, there are total 39 samples of New Zealand Pinot noir wines and every samples contain 3 bottles of Pinot noir wines. It means every 3 bottles of Pinot noir wines are from same brand and same vintage years. Among individual sample, two bottles of New Zealand Pinot noir wines evaluated by 7 experts and one bottles of New Zealand Pinot noir wines evaluated by 13 novices. Because novices only evaluated astringency, bitterness, sourness, astringency and clarity in Pinot noir wines, these sensory attributes will be ignored in this study.

### Chemical reagent

Folin-Ciocalteu reagent (Merck), vanillin assay (99%, ECP), gallic acid (98%, ACROS), catechin-hydrate (99.8%, Sigma Aldrich), methyl cellulose (1500cp, Sigma Aldrich), methanol (Merck), *o*-(dimethylamino)cinamaldehyde (*o*-DMACA) (Sigma Aldrich), HCl (37%, Thermo Fisher Scientific), glycerol (99%, Thermo Fisher Scientific), Na<sub>2</sub>CO<sub>3</sub> (99.5%, ECP), Ammonium sulfate (100.1%, AnalaR NORMAPUR®).

### Chemical measurement procedure

### Colour measurement

Shimadzu 2550 with 0.2 cm path length cuvettes were used for colour measurements. The colour of red wine can be determined at absorbance 420nm ( $A_{420\text{nm}}$ ) for yellow colour, absorbance 520nm ( $A_{520\text{nm}}$ ) for red colour and absorbance 620nm ( $A_{620\text{nm}}$ ) for blue colour. (Dobrei, Poiana, Sala, Ghita, & Gergen, 2010).

### Total phenolics assay

The total phenolic contents (TP) of wines were determined using the Folin-Ciocalteu method. Briefly, an aliquot (1 mL) of diluted wines was placed in a 10 mL volumetric flask, containing 5 mL of distilled water and 0.5 mL of Folin-Ciocalteu's reagent. After 3 min, 1.5 mL solution of  $\text{Na}_2\text{CO}_3$  (20g/L) was added and the total volume was made up to 10 mL with distilled water. Samples were stored for 60 min at room temperature in sealed flasks surrounded by aluminium foil, and the absorbance was measured against the blank (distilled water) at 750nm. Gallic acid was used as a standard for the construction of the calibration curve. The concentration of TP was expressed in mg/L as gallic acid equivalents (Ivanova et al., 2011).

### Total flavanol assay

Total flavanol content was evaluated by the vanillin assay, in which one molecule of vanillin reacts with one molecule of flavanol to produce a red chromophore. The conversion was monitored as an increase in absorbance at 500 nm. One volume of sample diluted in methanol was mixed with 2.5 volumes of vanillin (1% in methanol) and 2.5 volumes of HCl (9M in methanol). The mixture was incubated for 20 min at 35 °C before analysis. For each sample, a blank was used in which the vanillin solution was replaced with methanol alone. A standard curve was constructed with catechin-hydrate (mg/L) (Tabart, Kevers, Pincemail, Defraigne, & Dommes, 2010).

### Total flavan-3-ols assay

The concentration of total flavan-3-ols was measured using the q-

(dimethylamino)cinamaldehyde (q-DMACA) method (Ivanova, Stefova, & Chinnici, 2010). The contents of flavan-3-ols in the wines are expressed as catechin-hydrate equivalents (mg/L). An aliquot (1mL) of an appropriately diluted sample was added to a 10 mL volumetric flask followed by the addition of 3 drops of glycerol and 5 mL q-DMACA reagent. The total volume was made up to 10 mL with methanol and after 7 min, the absorbance was read at 640nm against a methanol blank. The DMACA reagent was prepared immediately before use, and contained 1% (w/v) DMACA in a cold mixture of methanol and HCl (4:1).

#### Total anthocyanins assay

Wine samples were diluted with a solution consisting of 70/30/1(v/v/v) ethanol/water/HCl (concentrated) and the absorbance was measured at 540nm (Ivanova, Stefova, & Chinnici, 2010). Due to the lack of a malvidin-3-glucoside standard, the total anthocyanic content are expressed as malvidin-3-glucoside equivalents (mg/L) and calculated using the following equation

$$TA_{540nm} \text{ (mg/L)} = A_{540nm} 16.7d \text{ (Ivanova, Stefova, \& Chinnici, 2010)}$$

Where  $A_{540nm}$  is the absorbance at 540nm and d is the dilution.

#### Total tannins assay

The use of other polymers to precipitate tannins has also been utilized in the methyl cellulose precipitable tannin assay (MCP). Briefly 3 mL MCP solution (0.04% w/v, 1500 cP viscosity) was added into 0.25 ml wine sample. After 1 minute, 2 mL of a saturated solution of  $(NH_4)_2SO_4$  and 4.75 mL distilled water are added. A control sample is also prepared, but with distilled water instead of MCP solution. After 10 minutes, the samples are centrifuged for 5 min, and the tannin content is obtained by comparing the  $A_{280nm}^{control}$  and  $A_{280nm}$  treatment referenced to catechin-hydrate equivalents (mg/L) (Aleixandre-Tudo, Buica, Nieuwoudt, Aleixandre, & Du Toit, 2017).

#### Chemical age

To 0.1 mL of wine, 10 mL of 1 N HCl was added and the value of absorbance was measured at 520nm in a 10 mm cuvette after 60 minutes. And then, this sample was measure at 520nm ( $A_{520nm}^{HCl}$ ) and 280nm ( $A_{280nm}^{HCl}$ ). Chemical age= $A_{520nm}^{HCl}/A_{280nm}^{HCl}$  (Dobrei, Poiana, Sala, Ghita, & Gergen, 2010).

### pH measurement

Edge pH meter has been applied to measure Pinot noir wines' pH.

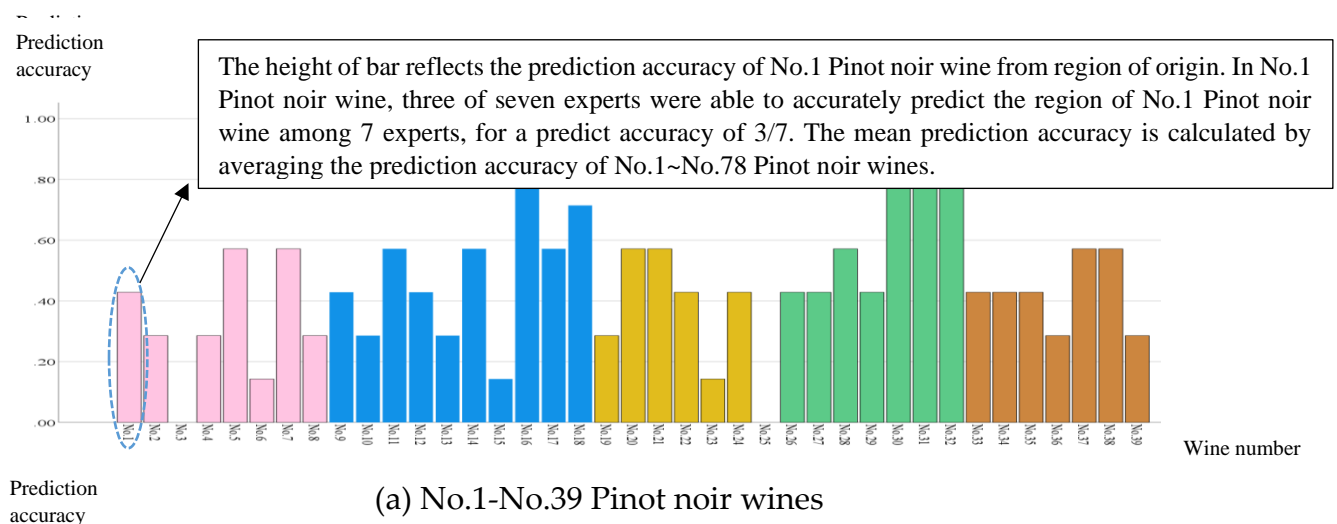

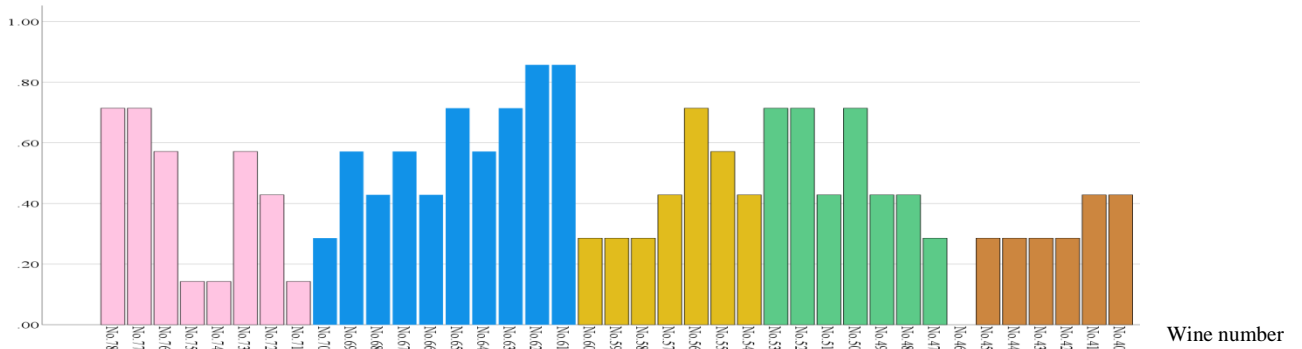

(b) No.40-No.78 Pinot noir wines

**Figure S1.** The prediction accuracy of experts on regions of origins. Figure S1 (a) displayed the prediction accuracies of No.1-No.39 Pinot noir wines evaluated by seven experts and Figure S1 (b) displayed the prediction accuracies of No.40-No.78 Pinot noir wines evaluated by seven experts.

Notes:

- Pink bar represents Pinot noir wines produced from Central Otago, blue bar represents Pinot noir wines produced from Marlborough, yellow bar represents Pinot noir wines produced from Nelson, green bar represents Pinot noir wines produced from Martinborough and bronze bar produced from North Canterbury.
- The prediction accuracy is calculated as follows, take No.1 Pinot noir wines as example, three of seven experts were able to accurately predict No.1 Pinot noir wines' regions of origin, the prediction accuracy is calculated as three divided seven.
- The mean accuracy is calculated the average prediction accuracy from No.1~No.78 Pinot noir wines with 45.421%.

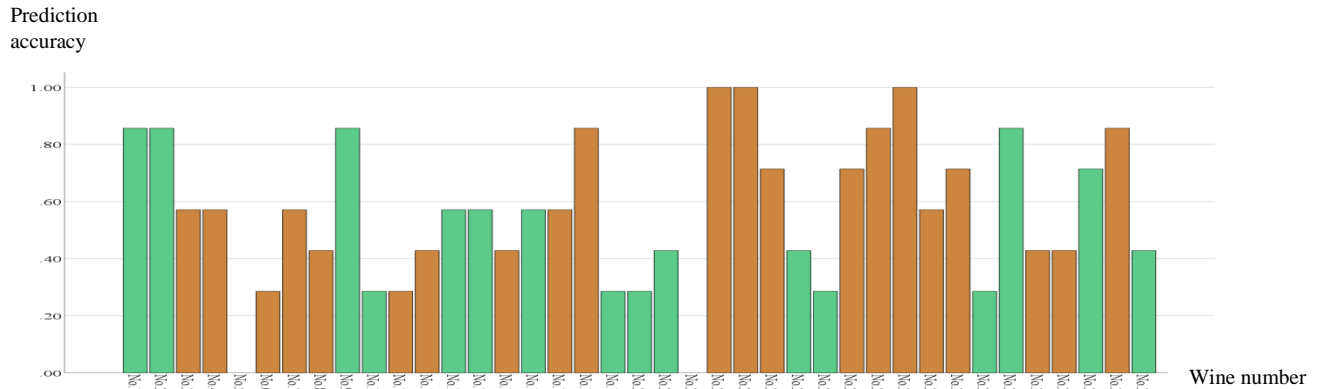

(a) No.1-No.39 Pinot noir wines

Prediction accuracy

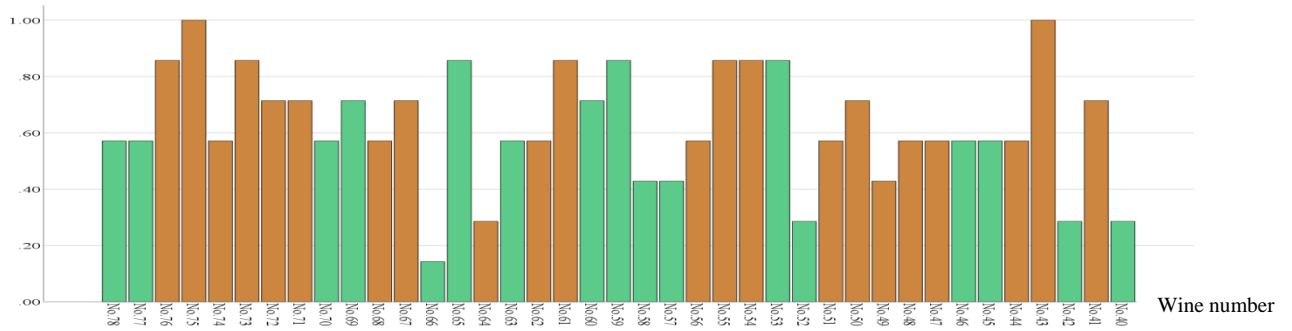

(b) No.40-No.78 Pinot noir wines

**Figure S2.** The prediction accuracy of experts on vintages. Figure S2 (a) displayed the prediction accuracies of No.1-No.39 Pinot noir wines evaluated by seven experts and Figure S2 (b) displayed the prediction accuracies of No.40-No.78 Pinot noir wines evaluated by seven experts.

Notes:

- Green bar represents Pinot noir wines with new vintages, bronze bar represents Pinot noir wines with old vintages.
- The prediction accuracy is calculated as follows, take No.1 Pinot noir wines as example, six of seven experts were able to accurately predict the vintage of Pinot noir wines, the prediction accuracy is calculated as six divided seven.
- The mean accuracy is calculated the average prediction accuracy from No.1~No.78 Pinot noir wines with 59.341%.

Prediction  
accuracy

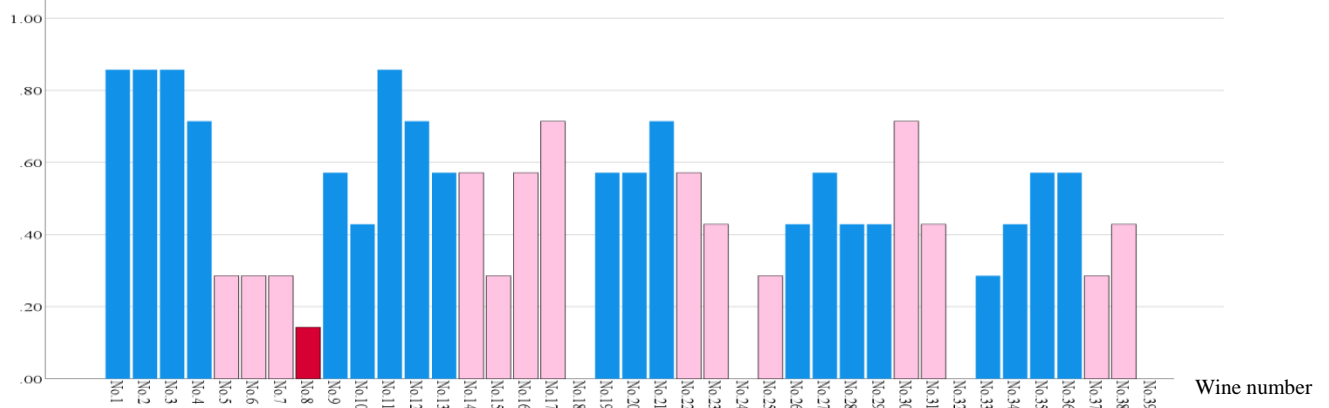

(a) No.1~No.39 Pinot noir wines

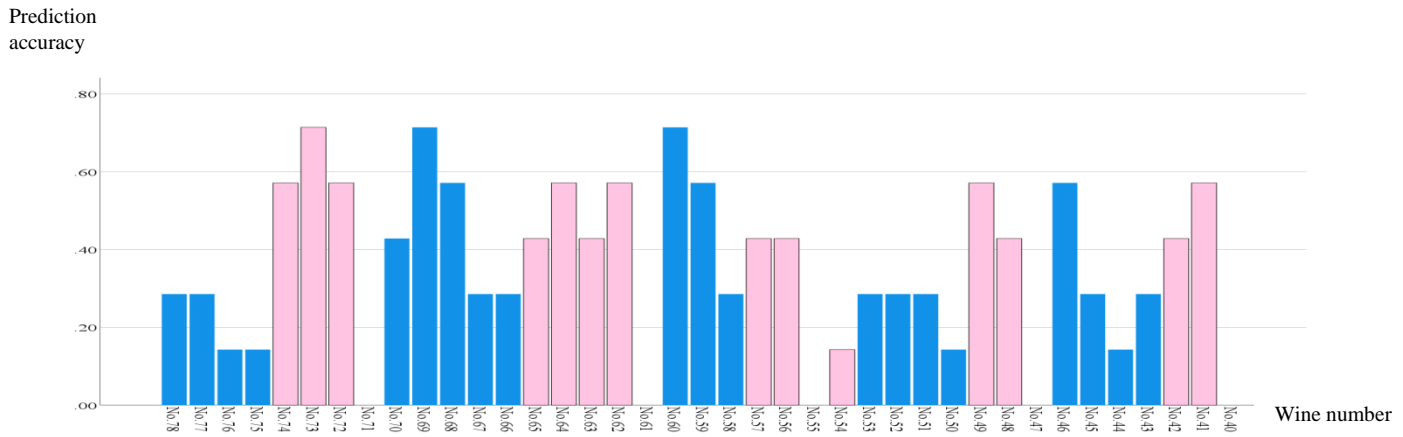

(b) No.40~No.78 Pinot noir wines

**Figure S3.** The prediction accuracy of experts on Price points. Figure S3 (a) displayed the prediction accuracies of No.1-No.39 Pinot noir wines evaluated by seven experts and Figure S3 (b) displayed the prediction accuracies of No.40-No.78 Pinot noir wines evaluated by seven experts.

Notes:

- Blue bar represents Pinot noir wines with low prices, pink bar represents Pinot noir wines with middle price and red bar represent Pinot noir wines with high prices.
- The prediction accuracy is calculated as follows, take No.1 Pinot noir wines as example, six of seven experts were able to accurately predict the price points of Pinot noir wines, the prediction accuracy is calculated as six divided seven.
- No.8 and No.71; No.18 and No.61, No.24 and No.55, No.32 and No.47, No.39 and No.40 are high prices. The mean accuracy is calculated the average prediction accuracy from No.1~No.78 Pinot noir wines with 41.209%.

During sensory evaluation, wine experts y were also required to anticipate the wines' regions of origin, vintages (old/new vintages), and price points. According to researchers, these Pinot noir wines are produced in five regions, including Central Otago, Marlborough, Nelson, Martinborough, and North Canterbury, with vintages ranging from 2011 to 2020 and prices between 10 and 80 New Zealand dollars. Once they had consumed one wine, they were expected to anticipate the regions of origin (Central Otago, Marlborough, Nelson, Martinborough, vintages (made before or after 2016), and prices (low, middle, or high prices). Taking No.1 Pinot noir wines as an example, three experts successfully forecasted Central Otago Pinot noir wines with an accuracy of 3/7 in Supplementary Figure 2 (a). The mean prediction accuracy was determined by averaging the prediction accuracy of the No. 1 to No. 78 Pinot noir wines.

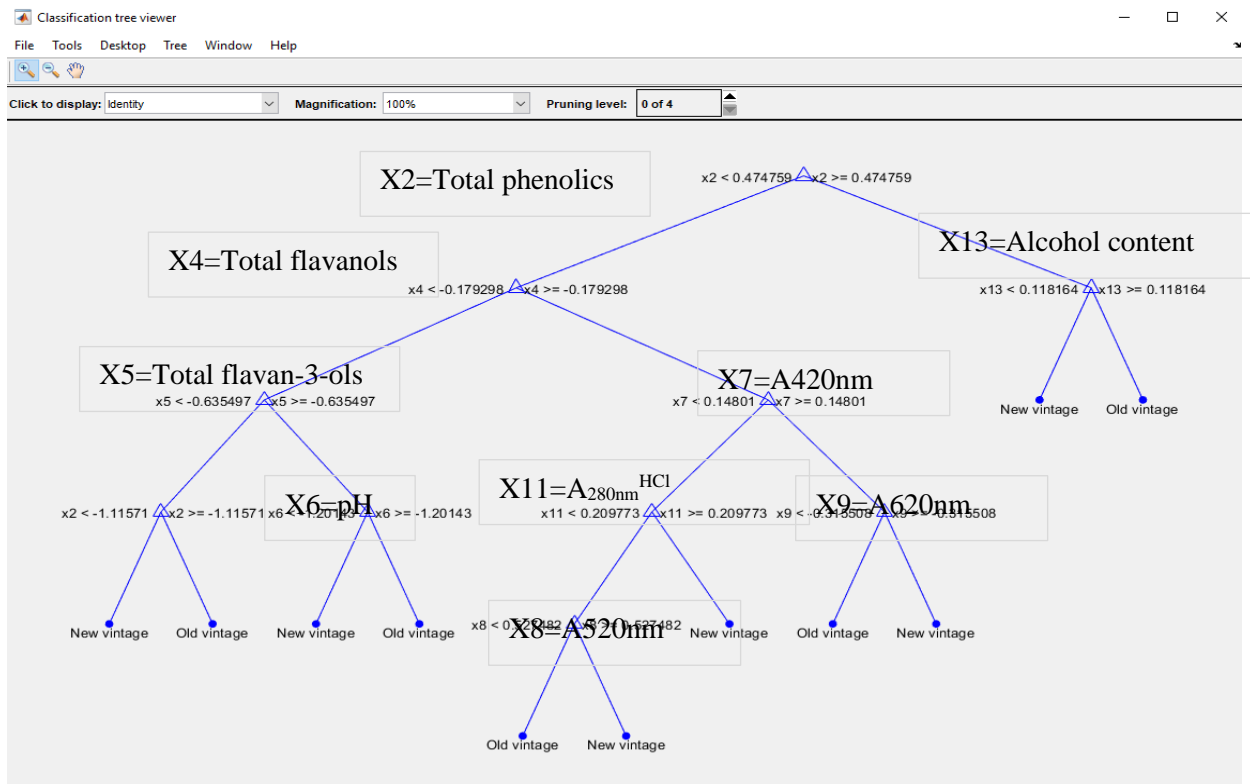

**Figure S4.** Classification tree structure about Pinot noir wines' vintages (old/new vintages)

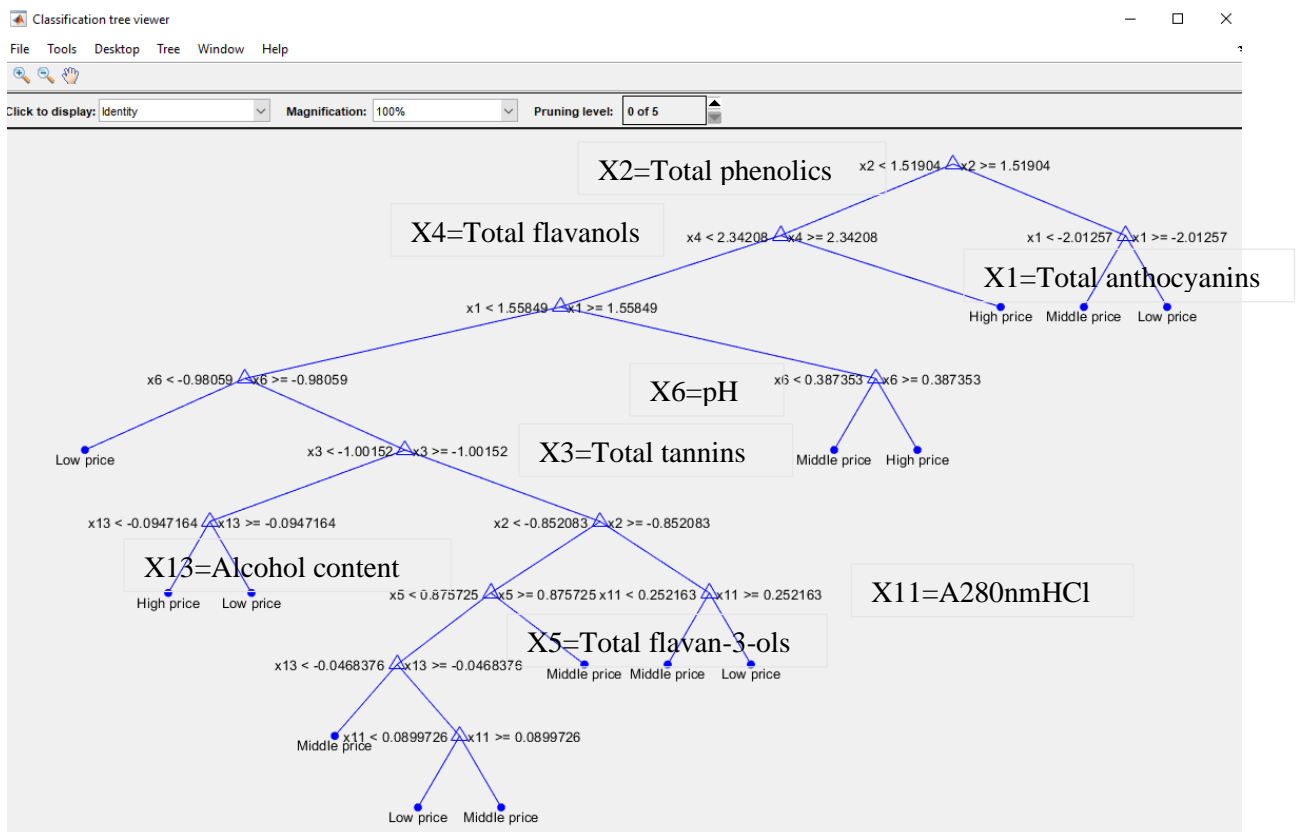



**Figure S5.** Classification tree structure about Pinot noir wines' price points**Table S1.** Descriptive statistics of 117 bottles Pinot noir wines

|                                     | <b>Variables</b>                  | <b>Count</b> | <b>Mean</b> | <b>Standard deviation</b> |
|-------------------------------------|-----------------------------------|--------------|-------------|---------------------------|
| Phenolic variables<br>(mg/L)        | Total phenolics                   | 117          | 3583        | 1077                      |
|                                     | Total anthocyanins                | 117          | 105         | 51                        |
|                                     | Total flavanols                   | 117          | 992         | 408                       |
|                                     | Total flavan-3ols                 | 117          | 505         | 181                       |
|                                     | Total tannins                     | 117          | 936         | 432                       |
| Colour<br>measurement<br>(AU)       | A <sub>420nm</sub>                | 117          | 0.605       | 0.27                      |
|                                     | A <sub>520nm</sub>                | 117          | 0.607       | 0.266                     |
|                                     | A <sub>620nm</sub>                | 117          | 0.307       | 0.255                     |
| Chemical age<br>measurement<br>(AU) | A <sub>520nm</sub> <sup>HCl</sup> | 117          | 0.161       | 0.082                     |
|                                     | A <sub>280nm</sub> <sup>HCl</sup> | 117          | 1.39        | 0.283                     |
|                                     | Chemical age                      | 117          | 0.116       | 0.054                     |
| Physicochemical<br>variables        | pH                                | 117          | 3.66        | 0.127                     |
|                                     | Alcohol content                   | 117          | 0.133       | 0.005                     |

**Notes:** AU indicates the absorbance at a Shimadzu 2550 spectrometer;

**Table S2.** 39 samples of New Zealand Pinot noir wines' product extrinsic cues (No.1-No.117 bottles)

| <b>Sample Number</b> | <b>Number</b> | <b>Region</b> | <b>Vintages</b> | <b>Price</b> |
|----------------------|---------------|---------------|-----------------|--------------|
| Sample 1             | No.1          | Central Otago | 2020            | 26           |
|                      | No.78         | Central Otago | 2020            | 26           |
|                      | No.79         | Central Otago | 2020            | 26           |
| Sample 2             | No.2          | Central Otago | 2019            | 27           |
|                      | No.77         | Central Otago | 2019            | 27           |
|                      | No.80         | Central Otago | 2019            | 27           |
| Sample 3             | No.3          | Central Otago | 2016            | 27           |
|                      | No.76         | Central Otago | 2016            | 27           |
|                      | No.81         | Central Otago | 2016            | 27           |
| Sample 4             | No.4          | Central Otago | 2014            | 23           |
|                      | No.75         | Central Otago | 2014            | 23           |
|                      | No.82         | Central Otago | 2014            | 23           |
| Sample 5             | No.5          | Central Otago | 2015            | 33           |

|           |       |               |      |      |
|-----------|-------|---------------|------|------|
|           | No.74 | Central Otago | 2015 | 33   |
|           | No.83 | Central Otago | 2015 | 33   |
| Sample 6  | No.6  | Central Otago | 2018 | 33   |
|           | No.73 | Central Otago | 2018 | 33   |
|           | No.84 | Central Otago | 2018 | 33   |
| Sample 7  | No.7  | Central Otago | 2016 | 55   |
|           | No.72 | Central Otago | 2016 | 55   |
|           | No.85 | Central Otago | 2016 | 55   |
| Sample 8  | No.8  | Central Otago | 2014 | 70   |
|           | No.71 | Central Otago | 2014 | 70   |
|           | No.86 | Central Otago | 2014 | 70   |
| Sample 9  | No.9  | Marlborough   | 2019 | 24   |
|           | No.70 | Marlborough   | 2019 | 24   |
|           | No.87 | Marlborough   | 2019 | 24   |
| Sample 10 | No.10 | Marlborough   | 2018 | 16   |
|           | No.69 | Marlborough   | 2018 | 16   |
|           | No.88 | Marlborough   | 2018 | 16   |
| Sample 11 | No.11 | Marlborough   | 2014 | 27   |
|           | No.68 | Marlborough   | 2014 | 27   |
|           | No.89 | Marlborough   | 2014 | 27   |
| Sample 12 | No.12 | Marlborough   | 2012 | 27.5 |
|           | No.67 | Marlborough   | 2012 | 27.5 |
|           | No.90 | Marlborough   | 2012 | 27.5 |
| Sample 13 | No.13 | Marlborough   | 2018 | 24   |
|           | No.66 | Marlborough   | 2018 | 24   |
|           | No.91 | Marlborough   | 2018 | 24   |
| Sample 14 | No.14 | Marlborough   | 2017 | 48   |
|           | No.65 | Marlborough   | 2017 | 48   |
|           | No.92 | Marlborough   | 2017 | 48   |
| Sample 15 | No.15 | Marlborough   | 2014 | 35   |
|           | No.64 | Marlborough   | 2014 | 35   |
|           | No.93 | Marlborough   | 2014 | 35   |
| Sample 16 | No.16 | Marlborough   | 2017 | 35   |
|           | No.63 | Marlborough   | 2017 | 35   |
|           | No.94 | Marlborough   | 2017 | 35   |
| Sample 17 | No.17 | Marlborough   | 2016 | 45   |
|           | No.62 | Marlborough   | 2016 | 45   |
|           | No.95 | Marlborough   | 2016 | 45   |
| Sample 18 | No.18 | Marlborough   | 2013 | 63   |
|           | No.61 | Marlborough   | 2013 | 63   |
|           | No.96 | Marlborough   | 2013 | 63   |
| Sample 19 | No.19 | Nelson        | 2018 | 14   |
|           | No.60 | Nelson        | 2018 | 14   |

|           |        |                  |      |      |
|-----------|--------|------------------|------|------|
|           | No.97  | Nelson           | 2018 | 14   |
| Sample 20 | No.20  | Nelson           | 2019 | 22   |
|           | No.59  | Nelson           | 2019 | 22   |
|           | No.98  | Nelson           | 2019 | 22   |
| Sample 21 | No.21  | Nelson           | 2017 | 20   |
|           | No.58  | Nelson           | 2017 | 20   |
|           | No.99  | Nelson           | 2017 | 20   |
| Sample 22 | No.22  | Nelson           | 2017 | 40   |
|           | No.57  | Nelson           | 2017 | 40   |
|           | No.100 | Nelson           | 2017 | 40   |
| Sample 23 | No.23  | Nelson           | 2015 | 39   |
|           | No.56  | Nelson           | 2015 | 39   |
|           | No.101 | Nelson           | 2015 | 39   |
| Sample 24 | No.24  | Nelson           | 2016 | 75   |
|           | No.55  | Nelson           | 2016 | 75   |
|           | No.102 | Nelson           | 2016 | 75   |
| Sample 25 | No.25  | Nelson           | 2015 | 50   |
|           | No.54  | Nelson           | 2015 | 50   |
|           | No.103 | Nelson           | 2015 | 50   |
| Sample 26 | No.26  | Martinborough    | 2019 | 19   |
|           | No.53  | Martinborough    | 2019 | 19   |
|           | No.104 | Martinborough    | 2019 | 19   |
| Sample 27 | No.27  | Martinborough    | 2018 | 24   |
|           | No.52  | Martinborough    | 2018 | 24   |
|           | No.105 | Martinborough    | 2018 | 24   |
| Sample 28 | No.28  | Martinborough    | 2014 | 27   |
|           | No.51  | Martinborough    | 2014 | 27   |
|           | No.106 | Martinborough    | 2014 | 27   |
| Sample 29 | No.29  | Martinborough    | 2011 | 27.5 |
|           | No.50  | Martinborough    | 2011 | 27.5 |
|           | No.107 | Martinborough    | 2011 | 27.5 |
| Sample 30 | No.30  | Martinborough    | 2016 | 40   |
|           | No.49  | Martinborough    | 2016 | 40   |
|           | No.108 | Martinborough    | 2016 | 40   |
| Sample 31 | No.31  | Martinborough    | 2014 | 30   |
|           | No.48  | Martinborough    | 2014 | 30   |
|           | No.109 | Martinborough    | 2014 | 30   |
| Sample 32 | No.32  | Martinborough    | 2016 | 65   |
|           | No.47  | Martinborough    | 2016 | 65   |
|           | No.110 | Martinborough    | 2016 | 65   |
| Sample 33 | No.33  | North Canterbury | 2020 | 18   |
|           | No.46  | North Canterbury | 2020 | 18   |
|           | No.111 | North Canterbury | 2020 | 18   |

|           |        |                  |      |    |
|-----------|--------|------------------|------|----|
| Sample 34 | No.34  | North Canterbury | 2018 | 15 |
|           | No.45  | North Canterbury | 2018 | 15 |
|           | No.112 | North Canterbury | 2018 | 15 |
| Sample 35 | No.35  | North Canterbury | 2016 | 22 |
|           | No.44  | North Canterbury | 2016 | 22 |
|           | No.113 | North Canterbury | 2016 | 22 |
| Sample 36 | No.36  | North Canterbury | 2014 | 27 |
|           | No.43  | North Canterbury | 2014 | 27 |
|           | No.114 | North Canterbury | 2014 | 27 |
| Sample 37 | No.37  | North Canterbury | 2018 | 50 |
|           | No.42  | North Canterbury | 2018 | 50 |
|           | No.115 | North Canterbury | 2018 | 50 |
| Sample 38 | No.38  | North Canterbury | 2016 | 43 |
|           | No.41  | North Canterbury | 2016 | 43 |
|           | No.116 | North Canterbury | 2016 | 43 |
| Sample 39 | No.39  | North Canterbury | 2017 | 79 |
|           | No.40  | North Canterbury | 2017 | 79 |
|           | No.117 | North Canterbury | 2017 | 79 |
